# Supplementary material
Source: HighWire-hosted journal article supplement (https://bmjopenquality.bmj.com/content/12/4/e002212)
Supplement: inline-supplementary-material-1 [file inline-supplementary-material-1.pdf]

## Supplement 1, ICD-10 Codes for Re-Presentations Potentially Related to Hypertension

|       |                                                                                             |
|-------|---------------------------------------------------------------------------------------------|
| E87.7 | Fluid overload                                                                              |
| E88.0 | Disorders of plasma-protein metabolism, not elsewhere classified                            |
| G40   | Epilepsy                                                                                    |
|       | Other generalised epilepsy and epileptic syndromes, without mention of intractable epilepsy |
| G40.4 |                                                                                             |
| G43.9 | Migraine, unspecified                                                                       |
| G44.2 | Tension-type headache                                                                       |
| G971  | Other reaction to spinal and lumbar puncture, headache                                      |
| H53.4 | Visual field defects                                                                        |
| H53.8 | Other visual disturbances                                                                   |
| H57.1 | Ocular pain                                                                                 |
| I10   | Essential (primary) hypertension                                                            |
| I21.4 | Acute subendocardial myocardial infarction                                                  |
| I42.0 | Dilated cardiomyopathy                                                                      |
| I50.0 | Congestive heart failure                                                                    |
| I67.4 | Hypertensive encephalopathy                                                                 |
| I67.8 | Other specified cerebrovascular diseases                                                    |
| I95.2 | Hypotension due to drugs                                                                    |
| I95.8 | Other hypotension                                                                           |
| I95.9 | Hypotension, unspecified                                                                    |
| N17.9 | Acute kidney failure, unspecified                                                           |
| N19   | Unspecified kidney failure                                                                  |
| O10   | Pre-existing hypertension in pregnancy, childbirth and the puerperium                       |
| O11   | Pre-eclampsia superimposed on chronic hypertension                                          |
| O14.1 | Severe pre-eclampsia                                                                        |
| O14.2 | HELLP syndrome                                                                              |
| O14.9 | Pre-eclampsia, unspecified                                                                  |
| O15.2 | Eclampsia in the puerperium                                                                 |
| O16   | Unspecified maternal hypertension                                                           |
| O268  | Kidney disorders in pregnancy, childbirth and the puerperium                                |
| O89.4 | Spinal and epidural analgesia induced headache during the puerperium                        |
| O90.3 | Cardiomyopathy in the puerperium                                                            |
| O90.4 | Postpartum acute kidney failure                                                             |
| O99.4 | Diseases of the circulatory system in pregnancy, childbirth and the puerperium              |
|       | Diseases of the circulatory system complicating pregnancy, childbirth and the puerperium    |
| O99.4 |                                                                                             |
| R03.0 | Elevated blood pressure reading without diagnosis of hypertension                           |
| R07.1 | Chest pain on breathing                                                                     |
| R07.2 | Precordial pain                                                                             |
| R07.3 | Other chest pain                                                                            |
| R07.4 | Chest pain, unspecified                                                                     |
| R42   | Dizziness and giddiness                                                                     |
| R51   | Headache                                                                                    |
| R55   | Syncope and collapse                                                                        |
| R57.0 | Cardiogenic shock                                                                           |
| T88.5 | Headache due to anaesthesia                                                                 |

Y52.1 Calcium-channel blockers causing adverse effects in therapeutic use

Supplement 2, ICD-10 (international classification of diseases 10<sup>th</sup> revision) codes within the representations database potentially related to post-partum hypertension. Used to select for manual medical record review.
