# Supplementary material
Source: HighWire-hosted journal article supplement (https://bmjopenquality.bmj.com/content/12/4/e002212)
Supplement: inline-supplementary-material-2 [file inline-supplementary-material-2.pdf]

Supplement 2, Northern Health, Antenatal Booking Checklist and Risk Assessment, last update 05/08/2021

| <b>Indications for Aspirin + Calcium &lt; 16 weeks (Still commence if 16 – 20 weeks)</b>               |    |                                                    |  |
|--------------------------------------------------------------------------------------------------------|----|----------------------------------------------------|--|
| Aspirin 150mg nocte + Calcium 1500mg daily until 36 weeks : <b>*Midwife to initiate at first visit</b> |    |                                                    |  |
| <input type="checkbox"/> 1x High Risk Factor                                                           | OR | <input type="checkbox"/> ≥ 2 Moderate Risk factors |  |
| Hypertensive disorders: HT, previous pre-eclampsia or HELLP                                            |    | Maternal age ≥40 years                             |  |
| Chronic kidney disease                                                                                 |    | BMI ≥ 35                                           |  |
| BMI ≥ 40                                                                                               |    | Family Hx of pre-eclampsia                         |  |
| Early GDM / T1 or T2 DM                                                                                |    | Assisted reproduction -IVF                         |  |
| Early onset (<34wks) FGR in previous pregnancy                                                         |    | Multiple pregnancy                                 |  |
| Autoimmune disease                                                                                     |    | PAPP-A <0.40                                       |  |
| Antiphospholipid Syndrome                                                                              |    |                                                    |  |

Supplement 2, Risk assessment tool for antenatal aspirin prescription at Northern Health. HT = hypertension, HELLP = haemolysis, elevated liver enzymes and low platelets, BMI = body mass index, GDM = gestational diabetes mellitus, FGR = fetal growth restriction, IVF = invitro fertilisation, PAPP-A = pregnancy associated plasma protein A.
